# Supplementary material for: Rapid Increase in the IS26-Mediated cfr Gene in E. coli Isolates with IncP and IncX4 Plasmids and Co-Existing cfr and mcr-1 Genes in a Swine Farm
Source: PubMed Central journal article supplement (PMC7823714; doi:10.3390/pathogens10010033), 2021-01-03
Supplement: pathogens-10-00033-s001.pdf [file pathogens-10-00033-s001.pdf]

## SUPPLEMENTAL MATERIALS

**Table 1.** Characterization of *cfr*-carrying transformants.

| Isolates     | MIC values <sup>a</sup> |     |       |     | Replicon type | Resistance genes |
|--------------|-------------------------|-----|-------|-----|---------------|------------------|
|              | AMP                     | FLR | CL    | APR |               |                  |
| GDE5P101T    | 1                       | 4   | 4     | 4   | IncI2         | <i>cfr mcr-1</i> |
| GDE5P132T    | 2                       | 2   | 4     | 4   | IncI2         | <i>cfr mcr-1</i> |
| GDE5P137T    | 128                     | 2   | 4     | 128 | IncX4         | <i>cfr mcr-1</i> |
| GDE6P124T    | 128                     | 4   | 4     | 4   | IncP          | <i>cfr mcr-1</i> |
| GDE6P128T    | 128                     | 4   | 4     | 4   | IncP          | <i>cfr mcr-1</i> |
| GDE6P129T    | 2                       | 4   | 4     | 4   | IncX4         | <i>cfr mcr-1</i> |
| GDE6P133T    | 2                       | 2   | 4     | 4   | IncX4         | <i>cfr mcr-1</i> |
| GDE6P143T    | 2                       | 2   | 4     | 4   | IncX4         | <i>cfr mcr-1</i> |
| GDE6P164T    | 4                       | 2   | 2     | 4   | IncX4         | <i>cfr mcr-1</i> |
| GDE6P165T    | 4                       | 2   | 2     | 4   | IncX4         | <i>cfr mcr-1</i> |
| GDE6P168T    | 128                     | 4   | 4     | 4   | IncX4         | <i>cfr mcr-1</i> |
| GDE6P169T    | 128                     | 4   | 4     | 4   | -             | <i>cfr mcr-1</i> |
| DH5 $\alpha$ | 2                       | 2   | 0.125 | 4   | -             | -                |
| ATCC 25922   | 2                       | 2   | 0.5   | 2   | -             | -                |

Note: a. AMP: ampicillin; APR: apramycin; FLR: florfenicol; CL: colistin.

**Table S2.** information of sample collection in the swine farm during the period of 2014-2017.

| Collected date | Suckling piglet (N) | Nursery pig (N) | Fattening pig (N) | Sow (N) | Boar (N) | Environment (N) | Total |
|----------------|---------------------|-----------------|-------------------|---------|----------|-----------------|-------|
| Jun-2014       | 50                  | 40              | 72                | 57      | 0        | 0               | 220   |
| Jul-2015       | 43                  | 80              | 67                | 51      | 0        | 0               | 241   |
| Jul-2016       | 15                  | 55              | 56                | 60      | 10       | 4               | 200   |
| Apr-2017       | 15                  | 50              | 60                | 55      | 10       | 10              | 200   |
| Total          | 123                 | 226             | 255               | 223     | 20       | 14              | 861   |

**Table 3.** Primers used for PCR and DNA sequencing in this study.

| Genes            | Prime Sequence (5' to 3')                                  | Size | References    |
|------------------|------------------------------------------------------------|------|---------------|
| <i>cfr</i>       | F:TGAAGTATAAAGCAGGTTGGGAGTCA<br>R:ACCATATAATTGACCACAAGCAGC | 746  | [1]           |
| <i>floR</i>      | F:CTGAGGGTGTTCGTCATCTAC<br>R:GCTCCGACAATGCTGACTAT          | 673  | [2]           |
| <i>fexA</i>      | F:GTACTTGTAGGTGCAATTACGGCTGA<br>R:CGCATCTGAGTAGGACATAGCGTC | 977  | [1]           |
| <i>fexB</i>      | F:TCCCCACTATTGGTGAAAGGAT<br>R:GCAATTCCCTTTTATGGACGTT       | 750  | [3]           |
| <i>optrA</i>     | F:AGGTGGTCAGCGAACTAA<br>R:ATCAACTGTTCCCATTCA               | 1395 | [4]           |
| <i>mcr-1</i>     | F:TCGCGGCATTTCGTTATA<br>R:GGTGGCGTTCAGCAGTC                | 582  | [5]           |
| parA of IncP     | F:AGTGTATTTGCCAGTTAG<br>R:GATGCGTTTATGAAGC                 | 496  | In this study |
| IS26- <i>cfr</i> | F:CGTTCAGCCAGCATCT<br>R:TCGCCTGTAGCACAAA                   | 663  | In this study |
| <i>cfr</i> -IS26 | F:AAAGCAGGTTGGGAGTC<br>R:GTGAAGAAGTGGCAGA                  | 1207 | In this study |

Note: F: forward primer; R: reverse primer.

#### References:

- [1] Kehrenberg, C, Schwarz, S. Distribution of florfenicol resistance genes *fexA* and *cfr* among chloramphenicol-resistant *Staphylococcus* isolates. *Antimicrob Agents Chemother* 2006; 50: 1156-63.
- [2] Chen S, Zhao S, White DG *et al.* Characterization of multiple-antimicrobial-resistant *salmonella* serovars isolated from retail meats. *Appl Environ Microbiol* 2004; 70:1-7.
- [3] Liu HB, Wang Y, Wu CM *et al.* novel phenicol exporter gene, *fexB*, found in enterococci of animal origin. *J Antimicrob Chemother* 2012; 67: 322-5.
- [4] Wang Y, Lv Y, Cai J *et al.* A novel gene, *optrA*, that confers transferable resistance to oxazolidinones and phenicols and its presence in *Enterococcus faecalis* and *Enterococcus faecium* of human and animal origin. *J Antimicrob Chemother* 2015; 70:2182-90.
- [5] Wang J, Huang XY, Xia YB *et al.* Clonal Spread of *Escherichia coli* ST93 Carrying *mcr-1*-Harboring IncN1-IncHI2/ST3 Plasmid Among Companion Animals, China. *Front Microbiol* 2018; 9:2989.
